# Supplementary material for: Interaction between succinic acid and sulfuric acid–base clusters
Source: Copernicus journal article supplement (doi:10.5194/acp-19-8003-2019), 2019-06-18
Supplement: Supplementary file 1 [file acp-19-8003-2019-supplement.pdf]

Supplement of Atmos. Chem. Phys., 19, 8003–8019, 2019  
<https://doi.org/10.5194/acp-19-8003-2019-supplement>  
© Author(s) 2019. This work is distributed under  
the Creative Commons Attribution 4.0 License.

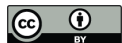

*Supplement of*

## **Interaction between succinic acid and sulfuric acid–base clusters**

**Yun Lin et al.**

*Correspondence to:* Renyi Zhang (renyi-zhang@tamu.edu) and Yuemeng Ji (jiym99@163.com)

The copyright of individual parts of the supplement might differ from the CC BY 4.0 License.

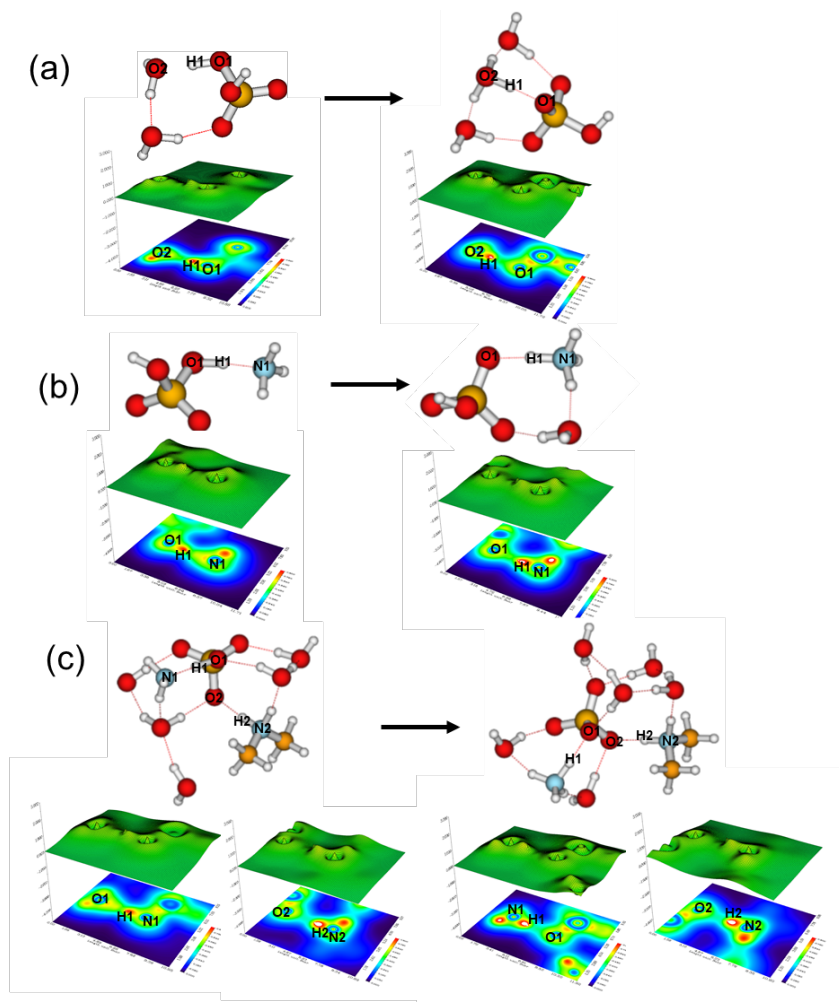

16

17 FIG. S1. Relief maps with the projection of localized orbital locator (LOL) for corresponding  
 18 clusters of (a)  $\text{SA} \cdot (\text{W})_2$  and  $\text{SA} \cdot (\text{W})_3$ , (b)  $\text{SA} \cdot \text{AM}$  and  $\text{SA} \cdot \text{AM} \cdot \text{W}$ , and (c)  $\text{SA} \cdot \text{DMA} \cdot \text{AM} \cdot (\text{W})_5$   
 19 and  $\text{SA} \cdot \text{DMA} \cdot \text{AM} \cdot (\text{W})_6$ . Hydrogen bonds are shown as dashed lines. A large LOL value means  
 20 that electrons are greatly localized, indicating the existence of a covalent bond.

21

22 Table S1. Laplacian of electron densities at BCPs of the nitrogen-hydrogen bond in the clusters  
 23 (a.u.).

| Clusters      | Bonds | No. of water |          |          |          |          |          |          |
|---------------|-------|--------------|----------|----------|----------|----------|----------|----------|
|               |       | <i>0</i>     | <i>1</i> | <i>2</i> | <i>3</i> | <i>4</i> | <i>5</i> | <i>6</i> |
| SA•AM         | N1-H1 | 0.028        | -1.046   | -1.512   | -1.535   | -1.526   | -1.599   | -1.625   |
| SA•AM•SUA     | N1-H1 | -1.278       | -1.510   | -1.528   | -1.597   | -1.576   | -1.658   | -1.582   |
| SA•DMA        | N2-H2 | -1.443       | -1.372   | -1.513   | -1.524   | -1.534   | -1.545   | -1.592   |
| SA•DMA•SUA    | N2-H2 | -1.488       | -1.480   | -1.603   | -1.604   | -1.544   | -1.613   | -1.555   |
| SA•DMA•AM     | N1-H1 | 0.076        | 0.078    | 0.038    | 0.016    | 0.029    | 0.016    | -1.394   |
|               | N2-H2 | -1.312       | -1.324   | -1.321   | -1.427   | -1.524   | -1.547   | -1.504   |
| SA•DMA•AM•SUA | N1-H1 | -1.351       | -1.388   | -1.304   | -0.866   | -1.560   | -1.528   | -1.575   |
|               | N2-H2 | -1.142       | -1.117   | -1.396   | -1.610   | -1.355   | -1.510   | -1.513   |

24 Note: N1 is the nitrogen atom on the ammonia (AM) molecule; N2 is the nitrogen atom on the  
 25 dimethylamine (DMA) molecule; H1 is the hydrogen atom on one of the hydroxyl functions of sulfuric  
 26 acid (SA) molecule and bound to N1; H2 is the hydrogen atom on one of the hydroxyl functions of SA  
 27 (SA) molecule and bound to N2.

28

29

30 Table S2. Electron densities at BCPs of the nitrogen-hydrogen bond in the clusters (a.u.).

| Clusters      | Bonds | No. of water |          |          |          |          |          |          |
|---------------|-------|--------------|----------|----------|----------|----------|----------|----------|
|               |       | <i>0</i>     | <i>1</i> | <i>2</i> | <i>3</i> | <i>4</i> | <i>5</i> | <i>6</i> |
| SA•AM         | N1-H1 | 0.091        | 0.248    | 0.300    | 0.302    | 0.301    | 0.315    | 0.322    |
| SA•AM•SUA     | N1-H1 | 0.271        | 0.298    | 0.301    | 0.311    | 0.308    | 0.321    | 0.307    |
| SA•DMA        | N2-H2 | 0.295        | 0.285    | 0.302    | 0.303    | 0.304    | 0.306    | 0.313    |
| SA•DMA•SUA    | N2-H2 | 0.297        | 0.297    | 0.311    | 0.313    | 0.306    | 0.314    | 0.305    |
| SA•DMA•AM     | N1-H1 | 0.063        | 0.060    | 0.085    | 0.095    | 0.090    | 0.094    | 0.287    |
|               | N2-H2 | 0.281        | 0.281    | 0.280    | 0.294    | 0.304    | 0.307    | 0.301    |
| SA•DMA•AM•SUA | N1-H1 | 0.283        | 0.284    | 0.275    | 0.230    | 0.306    | 0.302    | 0.312    |
|               | N2-H2 | 0.258        | 0.260    | 0.288    | 0.314    | 0.284    | 0.300    | 0.301    |

31 Note: N1 is the nitrogen atom on the ammonia (AM) molecule; N2 is the nitrogen atom on the  
32 dimethylamine (DMA) molecule; H1 is the hydrogen atom on one of the hydroxyl functions of sulfuric  
33 acid (SA) molecule and bound to N1; H2 is the hydrogen atom on one of the hydroxyl functions of SA  
34 (SA) molecule and bound to N2.

35

36 Table S3 Potential energy densities at BCPs of the nitrogen-hydrogen bond in the clusters (a.u.).

| Clusters      | Bonds | No. of water |          |          |          |          |          |          |
|---------------|-------|--------------|----------|----------|----------|----------|----------|----------|
|               |       | <i>0</i>     | <i>1</i> | <i>2</i> | <i>3</i> | <i>4</i> | <i>5</i> | <i>6</i> |
| SA•AM         | N1-H1 | -0.087       | -0.373   | -0.478   | -0.483   | -0.481   | -0.499   | -0.508   |
| SA•AM•SUA     | N1-H1 | -0.424       | -0.476   | -0.482   | -0.499   | -0.493   | -0.513   | -0.493   |
| SA•DMA        | N2-H2 | -0.466       | -0.449   | -0.481   | -0.484   | -0.486   | -0.488   | -0.499   |
| SA•DMA•SUA    | N2-H2 | -0.475       | -0.473   | -0.500   | -0.500   | -0.487   | -0.503   | -0.489   |
| SA•DMA•AM     | N1-H1 | -0.053       | -0.050   | -0.078   | -0.091   | -0.085   | -0.090   | -0.452   |
|               | N2-H2 | -0.437       | -0.439   | -0.438   | -0.461   | -0.484   | -0.488   | -0.479   |
| SA•DMA•AM•SUA | N1-H1 | -0.443       | -0.448   | -0.431   | -0.332   | -0.488   | -0.482   | -0.496   |
|               | N2-H2 | -0.394       | -0.394   | -0.453   | -0.502   | -0.446   | -0.478   | -0.479   |

37 Note: N1 is the nitrogen atom on the ammonia (AM) molecule; N2 is the nitrogen atom on the  
38 dimethylamine (DMA) molecule; H1 is the hydrogen atom on one of the hydroxyl functions of sulfuric  
39 acid (SA) molecule and bound to N1; H2 is the hydrogen atom on one of the hydroxyl functions of SA  
40 (SA) molecule and bound to N2.

41

42
